# Supplementary material for: Accuracy of dental implant placement using different dynamic navigation and robotic systems: an in vitro study
Source: PubMed Central journal article supplement (PMC11227595; doi:10.1038/s41746-024-01178-6), 2024-07-06
Supplement: 41746_2024_1178_MOESM1_ESM.pdf [file 41746_2024_1178_MOESM1_ESM.pdf]

## Deviations between the planned and placed implants of five groups

| Active dynamic navigation system |                          |                                 |                       |                     |  |                             |                       |                     |
|----------------------------------|--------------------------|---------------------------------|-----------------------|---------------------|--|-----------------------------|-----------------------|---------------------|
|                                  | No. of implant surgeries | Mandibular left central incisor |                       |                     |  | Mandibular left first molar |                       |                     |
|                                  |                          | Coronal deviation (mm)          | Apical deviation (mm) | Axial deviation (°) |  | Coronal deviation (mm)      | Apical deviation (mm) | Axial deviation (°) |
| Surgeons 1                       | 1                        | 0.59                            | 1.09                  | 2.54                |  | 1.15                        | 1.63                  | 3.25                |
|                                  | 2                        | 0.84                            | 1.32                  | 2.61                |  | 0.88                        | 1.25                  | 2.66                |
|                                  | 3                        | 0.78                            | 1.24                  | 2.51                |  | 0.75                        | 1.10                  | 2.02                |
|                                  | 4                        | 0.90                            | 1.29                  | 1.94                |  | 0.88                        | 1.27                  | 2.16                |
|                                  | 5                        | 0.64                            | 1.04                  | 2.23                |  | 0.96                        | 1.26                  | 1.78                |
|                                  | 6                        | 1.05                            | 1.59                  | 2.63                |  | 1.05                        | 1.31                  | 2.14                |
|                                  | 7                        | 0.84                            | 1.18                  | 1.85                |  | 0.98                        | 1.21                  | 1.37                |
|                                  | 8                        | 0.91                            | 1.10                  | 1.36                |  | 0.85                        | 1.01                  | 1.17                |
|                                  | 9                        | 0.95                            | 1.15                  | 1.01                |  | 0.79                        | 0.90                  | 0.70                |
|                                  | 10                       | 0.94                            | 0.95                  | 1.34                |  | 0.99                        | 1.21                  | 1.18                |
|                                  | 11                       | 0.92                            | 1.06                  | 1.12                |  | 1.03                        | 1.18                  | 0.82                |
|                                  | 12                       | 0.85                            | 1.04                  | 0.93                |  | 0.82                        | 0.96                  | 0.88                |
| Surgeons 2                       | 1                        | 0.64                            | 1.15                  | 2.56                |  | 0.70                        | 1.22                  | 2.94                |
|                                  | 2                        | 0.66                            | 1.06                  | 1.94                |  | 0.79                        | 1.13                  | 2.35                |
|                                  | 3                        | 0.84                            | 1.24                  | 2.59                |  | 1.21                        | 1.57                  | 2.01                |

|    |            |      |      |      |      |      |      |      |      |
|----|------------|------|------|------|------|------|------|------|------|
|    | 4          | 0.67 | 0.94 | 1.37 |      | 0.85 | 0.87 | 0.98 |      |
|    | 5          | 0.58 | 1.13 | 2.80 |      | 0.95 | 1.35 | 2.21 |      |
|    | 6          | 0.84 | 1.30 | 2.82 |      | 1.06 | 1.29 | 1.31 |      |
|    | 7          | 1.07 | 1.20 | 1.64 |      | 0.94 | 1.20 | 1.48 |      |
|    | 8          | 0.92 | 1.16 | 1.25 |      | 0.95 | 0.89 | 0.91 |      |
|    | 9          | 0.85 | 1.43 | 3.27 |      | 0.96 | 1.12 | 1.55 |      |
|    | 10         | 0.84 | 1.39 | 2.63 |      | 0.72 | 0.85 | 1.03 |      |
|    | 11         | 0.43 | 0.49 | 2.93 |      | 0.85 | 1.19 | 1.99 |      |
|    | 12         | 0.74 | 1.38 | 3.21 |      | 1.19 | 1.25 | 1.15 |      |
|    | Surgeons 3 | 1    | 0.72 | 0.68 | 0.92 |      | 0.94 | 0.85 | 0.54 |
|    |            | 2    | 0.82 | 1.14 | 1.64 |      | 0.66 | 1.00 | 1.90 |
|    |            | 3    | 1.21 | 1.38 | 1.70 |      | 0.78 | 0.99 | 1.44 |
| 4  |            | 0.93 | 1.08 | 0.71 |      | 0.85 | 0.91 | 0.57 |      |
| 5  |            | 0.66 | 0.88 | 1.21 |      | 0.67 | 0.75 | 0.75 |      |
| 6  |            | 0.93 | 1.04 | 2.14 |      | 0.75 | 0.79 | 0.66 |      |
| 7  |            | 1.09 | 1.21 | 2.07 |      | 0.64 | 0.63 | 1.70 |      |
| 8  |            | 1.02 | 1.46 | 2.60 |      | 1.04 | 1.33 | 1.70 |      |
| 9  |            | 0.81 | 1.06 | 1.91 |      | 0.75 | 1.01 | 1.54 |      |
| 10 |            | 0.93 | 0.93 | 1.99 |      | 0.58 | 0.87 | 1.66 |      |
| 11 |            | 0.69 | 0.85 | 1.13 |      | 0.55 | 1.01 | 2.80 |      |
| 12 |            | 1.12 | 1.50 | 2.70 |      | 0.69 | 0.61 | 1.16 |      |

## Passive dynamic navigation system

|            | No. of implant surgeries | Mandibular left central incisor |                       |                     |  | Mandibular left first molar |                       |                     |
|------------|--------------------------|---------------------------------|-----------------------|---------------------|--|-----------------------------|-----------------------|---------------------|
|            |                          | Coronal deviation (mm)          | Apical deviation (mm) | Axial deviation (°) |  | Coronal deviation (mm)      | Apical deviation (mm) | Axial deviation (°) |
| Surgeons 1 | 1                        | 1.31                            | 0.66                  | 3.11                |  | 0.44                        | 0.95                  | 2.83                |
|            | 2                        | 1.78                            | 1.28                  | 4.31                |  | 1.18                        | 0.67                  | 2.23                |
|            | 3                        | 1.70                            | 1.73                  | 1.81                |  | 1.07                        | 1.39                  | 2.06                |
|            | 4                        | 1.55                            | 1.69                  | 1.24                |  | 2.30                        | 1.80                  | 4.21                |
|            | 5                        | 1.30                            | 1.86                  | 3.27                |  | 1.26                        | 1.24                  | 3.78                |
|            | 6                        | 1.20                            | 1.08                  | 0.63                |  | 0.65                        | 0.71                  | 2.67                |
|            | 7                        | 1.34                            | 1.23                  | 0.78                |  | 1.23                        | 1.35                  | 0.84                |
|            | 8                        | 1.38                            | 1.06                  | 4.70                |  | 0.61                        | 1.02                  | 3.65                |
|            | 9                        | 1.06                            | 0.80                  | 1.71                |  | 1.04                        | 1.14                  | 0.41                |
|            | 10                       | 1.09                            | 0.52                  | 1.87                |  | 0.50                        | 0.73                  | 2.59                |
|            | 11                       | 1.38                            | 0.84                  | 2.04                |  | 0.78                        | 1.18                  | 0.69                |
|            | 12                       | 1.05                            | 1.11                  | 1.94                |  | 1.22                        | 1.02                  | 1.12                |
| Surgeons 2 | 1                        | 0.52                            | 0.66                  | 1.26                |  | 0.70                        | 1.07                  | 2.65                |
|            | 2                        | 1.52                            | 1.50                  | 0.83                |  | 0.38                        | 0.40                  | 1.22                |
|            | 3                        | 1.47                            | 1.30                  | 1.71                |  | 1.27                        | 1.03                  | 3.24                |
|            | 4                        | 0.72                            | 0.94                  | 1.06                |  | 1.76                        | 1.48                  | 1.69                |

|            |    |      |      |      |  |      |      |      |
|------------|----|------|------|------|--|------|------|------|
|            | 5  | 0.92 | 1.18 | 1.72 |  | 0.12 | 0.46 | 1.90 |
|            | 6  | 0.76 | 1.29 | 2.54 |  | 0.55 | 0.55 | 0.49 |
|            | 7  | 0.88 | 0.81 | 0.46 |  | 0.70 | 0.77 | 4.32 |
|            | 8  | 0.78 | 0.85 | 1.43 |  | 0.83 | 0.91 | 0.58 |
|            | 9  | 0.80 | 0.90 | 0.55 |  | 0.73 | 0.77 | 3.53 |
|            | 10 | 0.66 | 0.61 | 0.32 |  | 0.59 | 0.65 | 0.41 |
|            | 11 | 0.77 | 0.61 | 0.98 |  | 0.63 | 0.66 | 0.45 |
|            | 12 | 1.18 | 1.33 | 0.70 |  | 1.60 | 1.72 | 1.76 |
| Surgeons 3 | 1  | 0.33 | 0.83 | 3.60 |  | 0.88 | 0.88 | 2.10 |
|            | 2  | 0.64 | 0.56 | 1.27 |  | 1.07 | 0.92 | 0.90 |
|            | 3  | 1.26 | 1.26 | 2.41 |  | 1.38 | 0.94 | 3.14 |
|            | 4  | 1.51 | 2.08 | 3.75 |  | 1.49 | 1.56 | 1.18 |
|            | 5  | 0.90 | 1.01 | 2.73 |  | 1.83 | 1.99 | 1.16 |
|            | 6  | 0.84 | 0.87 | 2.20 |  | 0.72 | 0.92 | 1.45 |
|            | 7  | 1.01 | 1.06 | 0.31 |  | 1.57 | 1.52 | 0.41 |
|            | 8  | 1.60 | 1.63 | 2.73 |  | 1.53 | 1.15 | 2.15 |
|            | 9  | 0.85 | 1.07 | 1.97 |  | 1.04 | 0.82 | 4.56 |
|            | 10 | 1.35 | 1.10 | 2.01 |  | 1.33 | 1.64 | 1.69 |
|            | 11 | 0.49 | 0.98 | 3.78 |  | 1.16 | 0.99 | 1.31 |
|            | 12 | 0.77 | 0.99 | 3.19 |  | 1.14 | 0.61 | 3.09 |

## Semi-active implant robot

|            | No. of implant surgeries | Mandibular left central incisor |                       |                     |  | Mandibular left first molar |                       |                     |
|------------|--------------------------|---------------------------------|-----------------------|---------------------|--|-----------------------------|-----------------------|---------------------|
|            |                          | Coronal deviation (mm)          | Apical deviation (mm) | Axial deviation (°) |  | Coronal deviation (mm)      | Apical deviation (mm) | Axial deviation (°) |
| Surgeons 2 | 1                        | 0.28                            | 0.33                  | 0.47                |  | 0.22                        | 0.31                  | 0.41                |
|            | 2                        | 0.47                            | 0.57                  | 0.68                |  | 0.37                        | 0.36                  | 0.50                |
|            | 3                        | 0.37                            | 0.48                  | 0.69                |  | 0.33                        | 0.37                  | 0.56                |
|            | 4                        | 0.51                            | 0.54                  | 0.35                |  | 0.27                        | 0.31                  | 0.30                |
|            | 5                        | 0.10                            | 0.13                  | 0.25                |  | 0.69                        | 0.71                  | 0.45                |
|            | 6                        | 0.35                            | 0.45                  | 0.67                |  | 0.32                        | 0.33                  | 0.27                |
|            | 7                        | 0.46                            | 0.50                  | 0.59                |  | 0.38                        | 0.38                  | 0.09                |
|            | 8                        | 0.37                            | 0.40                  | 0.52                |  | 0.39                        | 0.39                  | 0.56                |
|            | 9                        | 0.16                            | 0.12                  | 0.25                |  | 0.14                        | 0.07                  | 0.37                |
|            | 10                       | 0.43                            | 0.43                  | 0.05                |  | 0.54                        | 0.60                  | 0.44                |
|            | 11                       | 0.24                            | 0.25                  | 0.21                |  | 0.23                        | 0.27                  | 0.45                |
|            | 12                       | 0.20                            | 0.22                  | 0.27                |  | 0.16                        | 0.22                  | 0.59                |

## Passive implant robot

|            | No. of implant surgeries | Mandibular left central incisor |                       |                     |  | Mandibular left first molar |                       |                     |
|------------|--------------------------|---------------------------------|-----------------------|---------------------|--|-----------------------------|-----------------------|---------------------|
|            |                          | Coronal deviation (mm)          | Apical deviation (mm) | Axial deviation (°) |  | Coronal deviation (mm)      | Apical deviation (mm) | Axial deviation (°) |
| Surgeons 2 | 1                        | 0.28                            | 0.37                  | 0.81                |  | 0.35                        | 0.45                  | 0.85                |
|            | 2                        | 0.60                            | 0.73                  | 1.19                |  | 0.53                        | 0.68                  | 1.02                |
|            | 3                        | 0.55                            | 0.58                  | 0.90                |  | 0.73                        | 0.83                  | 0.98                |
|            | 4                        | 0.71                            | 0.95                  | 1.82                |  | 0.43                        | 0.61                  | 1.27                |
|            | 5                        | 0.16                            | 0.29                  | 1.17                |  | 0.34                        | 0.56                  | 1.41                |
|            | 6                        | 0.44                            | 0.48                  | 0.92                |  | 0.33                        | 0.37                  | 0.89                |
|            | 7                        | 0.28                            | 0.13                  | 0.73                |  | 0.44                        | 0.32                  | 1.73                |
|            | 8                        | 0.19                            | 0.35                  | 0.74                |  | 0.21                        | 0.20                  | 0.38                |
|            | 9                        | 0.27                            | 0.40                  | 0.75                |  | 0.26                        | 0.43                  | 1.02                |
|            | 10                       | 0.41                            | 0.46                  | 0.57                |  | 0.47                        | 0.52                  | 0.76                |
|            | 11                       | 0.62                            | 0.69                  | 1.78                |  | 0.26                        | 0.40                  | 1.06                |
|            | 12                       | 0.47                            | 0.61                  | 0.85                |  | 0.38                        | 0.53                  | 1.29                |

## Active implant robot

|            | No. of implant surgeries | Mandibular left central incisor |                       |                     |  | Mandibular left first molar |                       |                     |
|------------|--------------------------|---------------------------------|-----------------------|---------------------|--|-----------------------------|-----------------------|---------------------|
|            |                          | Coronal deviation (mm)          | Apical deviation (mm) | Axial deviation (°) |  | Coronal deviation (mm)      | Apical deviation (mm) | Axial deviation (°) |
| Surgeons 2 | 1                        | 0.32                            | 0.32                  | 0.64                |  | 0.21                        | 0.22                  | 0.63                |
|            | 2                        | 0.23                            | 0.24                  | 0.47                |  | 0.31                        | 0.26                  | 0.45                |
|            | 3                        | 0.05                            | 0.06                  | 0.42                |  | 0.22                        | 0.26                  | 0.64                |
|            | 4                        | 0.14                            | 0.12                  | 0.40                |  | 0.18                        | 0.12                  | 0.64                |
|            | 5                        | 0.55                            | 0.55                  | 0.47                |  | 0.55                        | 0.55                  | 1.04                |
|            | 6                        | 0.05                            | 0.09                  | 1.09                |  | 0.22                        | 0.27                  | 0.51                |
|            | 7                        | 0.18                            | 0.37                  | 1.00                |  | 0.18                        | 0.28                  | 0.64                |
|            | 8                        | 0.40                            | 0.39                  | 0.49                |  | 0.11                        | 0.13                  | 0.40                |
|            | 9                        | 0.38                            | 0.37                  | 0.75                |  | 0.42                        | 0.42                  | 0.36                |
|            | 10                       | 0.25                            | 0.22                  | 0.97                |  | 0.21                        | 0.19                  | 0.42                |
|            | 11                       | 0.23                            | 0.16                  | 0.62                |  | 0.54                        | 0.56                  | 1.00                |
|            | 12                       | 0.54                            | 0.55                  | 0.55                |  | 0.38                        | 0.37                  | 0.09                |
